# Supplementary material for: Tumor Infiltrating Lymphocytes Target HLA-I Phosphopeptides Derived From Cancer Signaling in Colorectal Cancer
Source: PubMed Central journal article supplement (PMC8421858; doi:10.3389/fimmu.2021.723566), 2021-08-24
Supplement: DataSheet_1.pdf [file DataSheet_1.pdf]

|      | Patient age | Tumor position      | Tumor size (mm) | Histological type         | Tumour Grade | Nodal Status | Metastases | Chemotherapy                          | Recurrence | Other          | HLA type   |               |            |
|------|-------------|---------------------|-----------------|---------------------------|--------------|--------------|------------|---------------------------------------|------------|----------------|------------|---------------|------------|
|      |             |                     |                 |                           |              |              |            |                                       |            |                | A*03, A*29 | B*07, B*51    | C*02, C*07 |
| CRC1 | 82          | anterior resection  | 110             | Adenocarcinoma of rectum  | 3            | 0            | x          | -                                     | N/A        |                | A*03, A*29 | B*07, B*51    | C*02, C*07 |
| CRC2 | 84          | left hemicolectomy  | 115 x 120 x 80  | Adenocarcinoma            | 3            | 0            | x          | -                                     | -          |                | A*02, A*23 | B*44          | C*04, C*05 |
| CRC3 | 57          | right hemicolectomy | 70 x 60         | Adenocarcinoma of caecum  | 2B           | 0            | x          | neoadjuvant 5FU and cisplatin         | -          |                | A*02, A*31 | B*40, B*45    | C*03, C*06 |
| CRC4 | 78          | right hemicolectomy | 45 x 30 x 20    | Adenocarcinoma of caecum  | 4            | 1            | x          | adjuvant Capecitabine and Oxaliplatin | -          |                | A*02, A*03 | B*07, B*14:02 | C*07, C*08 |
| CRC5 | 73          | right hemicolectomy | 80 x 130 x 35   | Adenocarcinoma of caecum  | 4            | 1            | x          | adjuvant Capecitabine and Oxaliplatin | -          | K-RAS mutation | A*02       | B*35, B*50:01 | C*04, C*06 |
| CRC6 | 61          | left hemicolectomy  | 65 x 40 x 13    | Adenocarcinoma of sigmoid | 3            | 0            | x          | -                                     | +          |                | A*02, A*03 | B*35, B*58    | C*04, C*07 |

### SUPPLEMENTARY TABLE S1 | Clinical data from patients of primary CRC samples used

Patient samples were obtained at colorectal cancer resection. This table shows the clinical data for the three primary colorectal cancer specimens used in phosphopeptide discovery and the six used for extraction of tumor infiltrating lymphocytes for immunological assays.

|        | Tumor sample     | Healthy tissue | Patient age | Primary tumor        |          |             | Time to progression | Other malignancies | HLA type   |            |      |
|--------|------------------|----------------|-------------|----------------------|----------|-------------|---------------------|--------------------|------------|------------|------|
|        |                  |                |             | Time since resection | Position | Dukes stage |                     |                    | A*02, A*03 | B*07       | C*07 |
| CRCLM1 | Liver metastasis | Liver          | 69          | 5 and 2 years        | Rectal   | B           | 6 weeks             | CLL                | A*02, A*03 | B*07       | C*07 |
| CRCLM2 | Liver metastasis | Liver          | 70          | 1 year               | Rectal   | B           | N/A                 | -                  | A*02, A*24 | B*08, B*27 | C*07 |

### SUPPLEMENTARY TABLE S2 | Clinical data from patients of CRC liver metastasis samples used

Patient samples were obtained at resection of CRC liver metastases. This table shows the clinical data for the two colorectal cancer liver metastases used in phosphopeptide discovery and for extraction of tumor infiltrating lymphocytes for immunological assays.

### A) CAD Fragmentation of a phosphopeptide

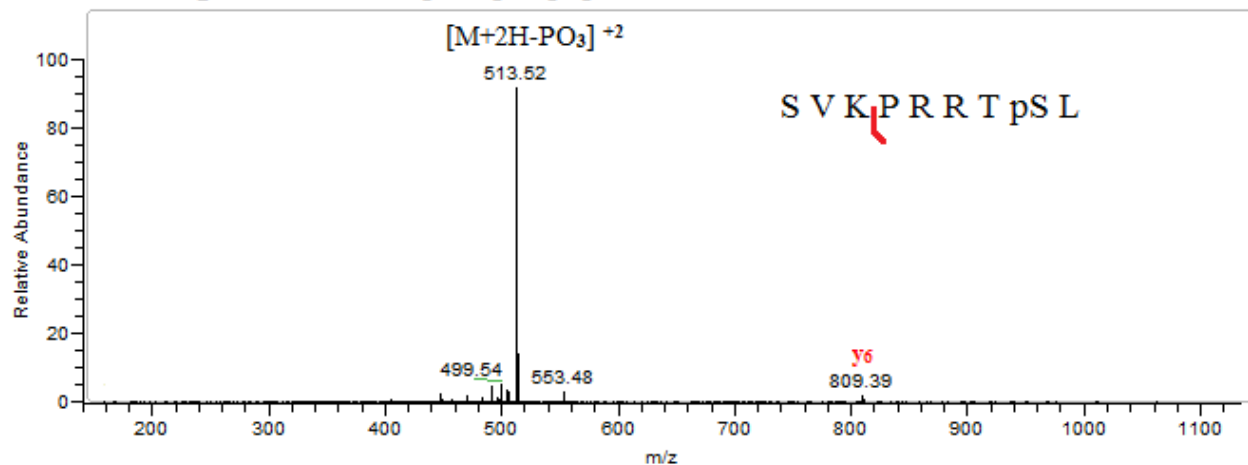

### B) ETD Fragmentation of a phosphopeptide

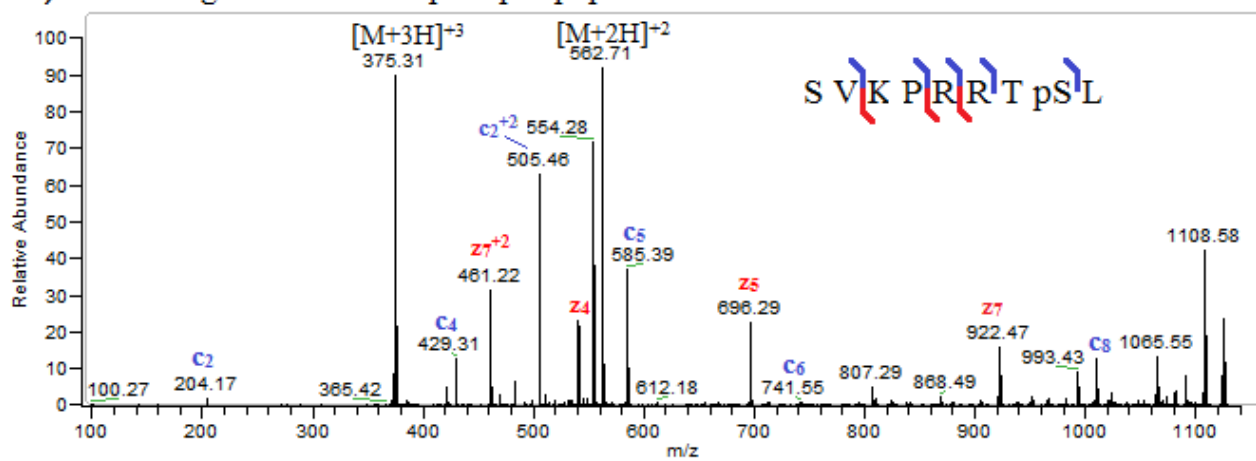

### SUPPLEMENTARY FIGURE S1 | Fragmentation of phosphopeptides

(A) CAD fragmentation results in the domination of a spectrum by the neutral loss of phosphoric acid, which can be used as a diagnostic in “CAD Neutral Loss Finder.” (B) ETD fragmentation preserves the post-translational modification, which allows us to sequence the phosphopeptide.

| HLA binding | Phosphopeptide | Uniprot # | Protein Name | CRC1    |        | CRC2    |        | CRC3    |        | LM1     |        | LM2     |        | colo205 | sw620 | hct116 |
|-------------|----------------|-----------|--------------|---------|--------|---------|--------|---------|--------|---------|--------|---------|--------|---------|-------|--------|
|             |                |           |              | Healthy | Tumour | Healthy | Tumour | Healthy | Tumour | Healthy | Tumour | Healthy | Tumour |         |       |        |
| A*01        | ITQGtPLKY      | Q9Y618    | NCOR2        |         |        |         |        |         |        |         |        |         |        |         |       |        |
|             | ISSsMHSly      | P50616    | TOB1         |         |        |         |        |         |        |         |        |         |        |         |       |        |
|             | LTDPsPTISSY    | Q8IX90    | SKA3         |         |        |         |        |         |        |         |        |         |        |         |       |        |
|             | NTDsPLRY       | P08865    | RPSAP19      |         |        |         |        |         |        |         |        |         |        |         |       |        |
|             | TMAsgPKDNY     | O60684    | KPNA6        |         |        |         |        |         |        |         |        |         |        |         |       |        |
| A*02        | RQIsQDVKL      | Q01433    | AMPD2        |         |        |         |        |         |        |         |        |         |        |         |       |        |
|             | RVAsPTSGV      | Q9Y4H2    | IRS2         |         |        |         |        |         |        |         |        |         |        |         |       |        |
|             | RQAsIELPSMAV   | P33241    | LSP1         |         |        |         |        |         |        |         |        |         |        |         |       |        |
|             | ALDsGASLLHL    | P57078    | RIPK4        |         |        |         |        |         |        |         |        |         |        |         |       |        |
|             | RLAsYLDRV      | P05783    | KRT18P19     |         |        |         |        |         |        |         |        |         |        |         |       |        |
|             | KLIDRTEsL      | P33241    | LSP1         |         |        |         |        |         |        |         |        |         |        |         |       |        |
|             | RIshELDS       | P10451    | SPP1         |         |        |         |        |         |        |         |        |         |        |         |       |        |
|             | LLsEEVEL       | Q8IY92    | BTBD12       |         |        |         |        |         |        |         |        |         |        |         |       |        |
|             | VMIGsPKKV      | Q68CZ2    | TNS3         |         |        |         |        |         |        |         |        |         |        |         |       |        |
|             | SMTRsPPRV      | Q9BRL6    | SFRS2B       |         |        |         |        |         |        |         |        |         |        |         |       |        |
|             | KLAsPELERL     | P05412    | JUN          |         |        |         |        |         |        |         |        |         |        |         |       |        |
|             | KLIDIVsSQKV    | O14757    | CHEK1        |         |        |         |        |         |        |         |        |         |        |         |       |        |
|             | FLDtPIAKV      | Q969G9    | NKD1         |         |        |         |        |         |        |         |        |         |        |         |       |        |
|             | RTLsPEIITV     | Q9H4A3    | WNK1         |         |        |         |        |         |        |         |        |         |        |         |       |        |
|             | RVLHsPPAV      | Q9Y4B5    | MTCL1        |         |        |         |        |         |        |         |        |         |        |         |       |        |
|             | RLSsPLHFV      | Q8NC44    | FAM134A      |         |        |         |        |         |        |         |        |         |        |         |       |        |
|             | VmIGsPKKV      | Q68CZ2    | TNS3         |         |        |         |        |         |        |         |        |         |        |         |       |        |
|             | RTHsLLLLL      | P34096    | RNASE4       |         |        |         |        |         |        |         |        |         |        |         |       |        |
| RQAsIELPSM  | P33241         | LSP1      |              |         |        |         |        |         |        |         |        |         |        |         |       |        |
| A*03        | RIYQyIQSR      | Q9Y463    | DYRK1B       |         |        |         |        |         |        |         |        |         |        |         |       |        |
|             | RILsGVVTK      | P62280    | RPS11        |         |        |         |        |         |        |         |        |         |        |         |       |        |
|             | GImsPLAKK      | Q03989    | ARID5A       |         |        |         |        |         |        |         |        |         |        |         |       |        |
|             | RLSsPISKR      | Q99728    | BARD1        |         |        |         |        |         |        |         |        |         |        |         |       |        |
|             | RVAsPTSGVK     | Q9Y4H2    | IRS2         |         |        |         |        |         |        |         |        |         |        |         |       |        |
|             | RTRsLSSLREK    | O94915    | FRYL         |         |        |         |        |         |        |         |        |         |        |         |       |        |
|             | RTMsEAALVRK    | Q6ZTQ3    | RASSF6       |         |        |         |        |         |        |         |        |         |        |         |       |        |
|             | SVRRsVLmK      | Q9H2J4    | PDCL3        |         |        |         |        |         |        |         |        |         |        |         |       |        |
|             | KLPsPAPARK     | Q8IY33    | MICALL2      |         |        |         |        |         |        |         |        |         |        |         |       |        |
| RVLsPLIIK   | Q8NCN4         | RNF169    |              |         |        |         |        |         |        |         |        |         |        |         |       |        |
| A*24        | RFKtQPVTf      | Q7Z7L8    | AG2          |         |        |         |        |         |        |         |        |         |        |         |       |        |
|             | RYQtQPVTl      | O95425    | SVIL         |         |        |         |        |         |        |         |        |         |        |         |       |        |
| A*29        | RIYQyIQSRf     | Q9Y463    | DYRK1B       |         |        |         |        |         |        |         |        |         |        |         |       |        |

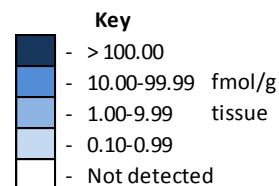

**SUPPLEMENTARY TABLE S3** | Phosphopeptides identified on CRC patient samples that are predicted to bind to HLA-A

MHC class I-bound peptides were eluted from tumor tissue and its healthy counterpart, or cultured cell lines. Phosphopeptides were IMAC enriched and characterized using LC-MS/MS. MHC class-I binding was predicted, using known HLA-alleles. Here 3 primary CRC, 2 CRC liver metastases and 3 cell line samples were analyzed.

| HLA binding  | Phosphopeptide          | Uniprot # | Protein Name | CRC1    |        | CRC2    |        | CRC3    |        | LM1     |        | LM2     |        | colo205 | sw620 | hct116 |
|--------------|-------------------------|-----------|--------------|---------|--------|---------|--------|---------|--------|---------|--------|---------|--------|---------|-------|--------|
|              |                         |           |              | Healthy | Tumour | Healthy | Tumour | Healthy | Tumour | Healthy | Tumour | Healthy | Tumour |         |       |        |
| B*07         | LPFISRLsI               | P47974    | ZFP36L2      |         |        |         |        |         |        |         |        |         |        |         |       |        |
|              | RPKtPPVVI               | Q96A49    | SYAP1        |         |        |         |        |         |        |         |        |         |        |         |       |        |
|              | SPFKRQLsL               | B7Z5W0    | NUMBL        |         |        |         |        |         |        |         |        |         |        |         |       |        |
|              | RPRsPNMQDL              | Q6T310    | RASL11A      |         |        |         |        |         |        |         |        |         |        |         |       |        |
|              | LPVsPRLQL               | P13688    | CEACAM1      |         |        |         |        |         |        |         |        |         |        |         |       |        |
|              | AVRPTRLsL               | Q9Y4H2    | IRS2         |         |        |         |        |         |        |         |        |         |        |         |       |        |
|              | SPRsPDRTL               | Q9UKN1    | MUC12        |         |        |         |        |         |        |         |        |         |        |         |       |        |
|              | QPQRRLsL                | Q9ULW0    | TPX2         |         |        |         |        |         |        |         |        |         |        |         |       |        |
|              | VPRPERRsSL              | Q6UWJ1    | TMCO3        |         |        |         |        |         |        |         |        |         |        |         |       |        |
|              | KPEsRRSLL               | Q6WKZ4    | RAB11FIP1    |         |        |         |        |         |        |         |        |         |        |         |       |        |
|              | APRKGsFSAL              | Q13619    | CUL4A        |         |        |         |        |         |        |         |        |         |        |         |       |        |
|              | RPTKIGRRsL              | Q96HN2    | AHCYL2       |         |        |         |        |         |        |         |        |         |        |         |       |        |
|              | RPDVAKRLsL              | O75815    | BCAR3        |         |        |         |        |         |        |         |        |         |        |         |       |        |
|              | RPFHGISTVsL             | Q5VZ89    | DENND4C      |         |        |         |        |         |        |         |        |         |        |         |       |        |
|              | RPVtPVSDL               | Q13118    | KLF10        |         |        |         |        |         |        |         |        |         |        |         |       |        |
|              | RPGsRQAGL               | Q96JY6    | PDLIM2       |         |        |         |        |         |        |         |        |         |        |         |       |        |
|              | RPDsAHKML               | Q8WX93    | PALLD        |         |        |         |        |         |        |         |        |         |        |         |       |        |
|              | RPRARsVDAL              | Q86X29    | LSR          |         |        |         |        |         |        |         |        |         |        |         |       |        |
|              | RARGIsPIVF              | Q96MU7    | YTHDC1       |         |        |         |        |         |        |         |        |         |        |         |       |        |
|              | APDsPRAFL               | unknown   | UNKNOWN      |         |        |         |        |         |        |         |        |         |        |         |       |        |
|              | SPRSPsTTYL or SPR       | Q13111    | CHAF1A       |         |        |         |        |         |        |         |        |         |        |         |       |        |
|              | RPFsPREAL               | Q86V48    | LUZP1        |         |        |         |        |         |        |         |        |         |        |         |       |        |
|              | RPRPVsPSSL              | P57059    | SIK1         |         |        |         |        |         |        |         |        |         |        |         |       |        |
| KPAsPKFIVTL  | Q6PJT7                  | ZC3H14    |              |         |        |         |        |         |        |         |        |         |        |         |       |        |
| TPRsPPLGL    | Q16584                  | MAP3K11   |              |         |        |         |        |         |        |         |        |         |        |         |       |        |
| RPRsPTGPSNSF | Q96I25                  | RBM17     |              |         |        |         |        |         |        |         |        |         |        |         |       |        |
| RPVsPFQEL    | unknown                 | UNKNOWN   |              |         |        |         |        |         |        |         |        |         |        |         |       |        |
| KPRsPVVEL    | P25098                  | ADRBK1    |              |         |        |         |        |         |        |         |        |         |        |         |       |        |
| RPRGsQSL     | P21860                  | ERBB3     |              |         |        |         |        |         |        |         |        |         |        |         |       |        |
| RPAAsPQRAQL  | unknown                 | UNKNOWN   |              |         |        |         |        |         |        |         |        |         |        |         |       |        |
| B*08         | DLKRRsMSI               | Q96N67    | DOCK7        |         |        |         |        |         |        |         |        |         |        |         |       |        |
|              | SVKPRRTsL               | P15822    | HIVEP1       |         |        |         |        |         |        |         |        |         |        |         |       |        |
|              | INKERRSsL               | Q5JTZ5    | C9ORF152     |         |        |         |        |         |        |         |        |         |        |         |       |        |
| B*15         | RQDsTPGKVFL or F        | P13056    | NR2C1        |         |        |         |        |         |        |         |        |         |        |         |       |        |
| B*27         | GRLsPAYSL               | Q86UU1    | PHLDB1       |         |        |         |        |         |        |         |        |         |        |         |       |        |
|              | GRLsPVPVPR              | Q9UKM9    | RALY         |         |        |         |        |         |        |         |        |         |        |         |       |        |
|              | RRFsRLENRY              | O43293    | DAPK3        |         |        |         |        |         |        |         |        |         |        |         |       |        |
|              | RRDsLQKPGL              | Q9NRM7    | LATS2        |         |        |         |        |         |        |         |        |         |        |         |       |        |
|              | RRAsQEANL               | Q6PJG2    | C14ORF43     |         |        |         |        |         |        |         |        |         |        |         |       |        |
| RRLsLFLNV    | Q99836                  | MYD88     |              |         |        |         |        |         |        |         |        |         |        |         |       |        |
| B*27/C*07    | KRFsFKKsF               | P29966    | MARCKS       |         |        |         |        |         |        |         |        |         |        |         |       |        |
|              | RRLsDSPVF               | P47974    | ZFP36L2      |         |        |         |        |         |        |         |        |         |        |         |       |        |
|              | KRYsGNMEY               | O95835    | LATS1        |         |        |         |        |         |        |         |        |         |        |         |       |        |
|              | RRMsLLSVV               | Q9ULI2    | RIMKLB       |         |        |         |        |         |        |         |        |         |        |         |       |        |
|              | RRSsFLQVF               | Q15436    | SEC23A       |         |        |         |        |         |        |         |        |         |        |         |       |        |
|              | RRSsIQSTF or RRsS       | Q92542    | NCSTN        |         |        |         |        |         |        |         |        |         |        |         |       |        |
|              | RRLsESSAL               | Q96555    | WRNIP1       |         |        |         |        |         |        |         |        |         |        |         |       |        |
| RRNsINRNF    | O00160                  | MYO1F     |              |         |        |         |        |         |        |         |        |         |        |         |       |        |
| B*44         | AENsPTRQQF              | Q86XP3    | DDX42        |         |        |         |        |         |        |         |        |         |        |         |       |        |
|              | KEMsPTRQL               | Q4G0N7    | C6ORF225     |         |        |         |        |         |        |         |        |         |        |         |       |        |
|              | AI sDLQQL               | O15302    | CAMK2        |         |        |         |        |         |        |         |        |         |        |         |       |        |
| B*45         | EERsPPAP                | P15408    | FOSL2        |         |        |         |        |         |        |         |        |         |        |         |       |        |
|              | EERsPSWISA              | Q02952    | AKAP12       |         |        |         |        |         |        |         |        |         |        |         |       |        |
|              | EERs <sup>ts</sup> WISA | Q02952    | AKAP12       |         |        |         |        |         |        |         |        |         |        |         |       |        |
|              | EERsPSWISA              | Q02952    | AKAP12       |         |        |         |        |         |        |         |        |         |        |         |       |        |
|              | REIsSSPTS               | Q9UQ35    | SRRM2        |         |        |         |        |         |        |         |        |         |        |         |       |        |
|              | AEAPPSKsP               | Q96D71    | REPS1        |         |        |         |        |         |        |         |        |         |        |         |       |        |
|              | AEKsYQNSP               | Q15648    | MED1         |         |        |         |        |         |        |         |        |         |        |         |       |        |
| SEAsPSREA    | Q13111                  | CHAF1A    |              |         |        |         |        |         |        |         |        |         |        |         |       |        |
| B*51         | FEDDDsNEKL              | O43719    | HTATSF1      |         |        |         |        |         |        |         |        |         |        |         |       |        |

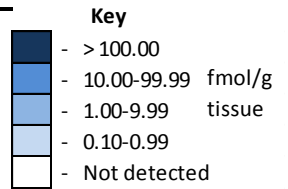

**SUPPLEMENTARY TABLE S4** | Phosphopeptides identified on CRC patient samples that are predicted to bind to HLA-B

| HLA binding | Phosphopeptide | Uniprot # | Protein Name | CRC1    |        | CRC2    |        | CRC3    |        | LM1     |        | LM2     |        | colo205 | sw620 | hct116 |
|-------------|----------------|-----------|--------------|---------|--------|---------|--------|---------|--------|---------|--------|---------|--------|---------|-------|--------|
|             |                |           |              | Healthy | Tumour | Healthy | Tumour | Healthy | Tumour | Healthy | Tumour | Healthy | Tumour |         |       |        |
| C*03        | KAFsPVRSV      | Q02363    | ID2          |         |        |         |        |         |        |         |        |         |        |         |       |        |
|             | RAHSsPASL      | P46937    | YAP1         |         |        |         |        |         |        |         |        |         |        |         |       |        |
|             | RSHsSPASL      | Q9GZV5    | WWTR1        |         |        |         |        |         |        |         |        |         |        |         |       |        |
| C*05        | RADsPVHVM      | O95402    | MED26        |         |        |         |        |         |        |         |        |         |        |         |       |        |
|             | RRDsIVAEL      | O14579    | COPE         |         |        |         |        |         |        |         |        |         |        |         |       |        |
|             | SIDsPQKL       | Q12888    | TP53BP1      |         |        |         |        |         |        |         |        |         |        |         |       |        |
|             | RSDsYVEL       | P52298    | NCBP2        |         |        |         |        |         |        |         |        |         |        |         |       |        |
| C*06        | RRSsSVAQV      | O15205    | UBD          |         |        |         |        |         |        |         |        |         |        |         |       |        |
|             | RRPsLLSEF      | O75376    | NCOR1        |         |        |         |        |         |        |         |        |         |        |         |       |        |
|             | RRNsAPVSV      | Q2M123    | ARHGAP31     |         |        |         |        |         |        |         |        |         |        |         |       |        |
| C*07        | RRGsFEVTL      | Q8IZQ5    | SELH         |         |        |         |        |         |        |         |        |         |        |         |       |        |
|             | RRLsFLVSY      | P47897    | QARS         |         |        |         |        |         |        |         |        |         |        |         |       |        |
|             | RKLSVILIL      | Q13433    | SLC39A6      |         |        |         |        |         |        |         |        |         |        |         |       |        |
|             | KRFsGTVRL      | P62906    | RPL10AP9     |         |        |         |        |         |        |         |        |         |        |         |       |        |
|             | RRSsQSWSL      | Q9Y4E1    | FAM21C       |         |        |         |        |         |        |         |        |         |        |         |       |        |
|             | HRNsMKVFL      | Q9NPR2    | SEMA4B       |         |        |         |        |         |        |         |        |         |        |         |       |        |
|             | RRKsQVAEL      | Q9BYG3    | MKI67IP      |         |        |         |        |         |        |         |        |         |        |         |       |        |
|             | KRLsVERIY      | P11388    | TOP2A        |         |        |         |        |         |        |         |        |         |        |         |       |        |
|             | RRLsGPLHTL     | Q86Y91    | KIF18B       |         |        |         |        |         |        |         |        |         |        |         |       |        |
|             | KLFPDtPLAL     | Q12906    | ILF3         |         |        |         |        |         |        |         |        |         |        |         |       |        |
|             | KYIsGPHEL      | P49454    | CENPF        |         |        |         |        |         |        |         |        |         |        |         |       |        |
|             | RRFsGTAVY      | Q6AHZ1    | ZNF518A      |         |        |         |        |         |        |         |        |         |        |         |       |        |
|             | MPRQPsATRL     | Q6NZ67    | FAM128B      |         |        |         |        |         |        |         |        |         |        |         |       |        |
| C*07/B*27   | HRLsPVKGEF     | Q9Y2L9    | LRCH1        |         |        |         |        |         |        |         |        |         |        |         |       |        |
|             | RRIDIsPSTLR    | Q9NYF8    | BCLAF1       |         |        |         |        |         |        |         |        |         |        |         |       |        |
|             | RRFsPPRRM      | Q15287    | LOC643446    |         |        |         |        |         |        |         |        |         |        |         |       |        |
|             | RRIsGVDRYY     | O15239    | NDUFA1       |         |        |         |        |         |        |         |        |         |        |         |       |        |
|             | KRMSPKPEL      | P41208    | CETN2        |         |        |         |        |         |        |         |        |         |        |         |       |        |
| C*06/C*07   | RRIsDPQVF      | Q4L180    | FILIP1L      |         |        |         |        |         |        |         |        |         |        |         |       |        |

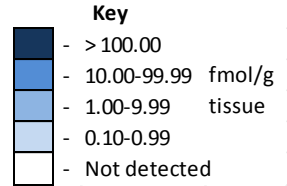

**SUPPLEMENTARY TABLE S5** | Phosphopeptides identified on CRC patient samples that are predicted to bind to HLA-C

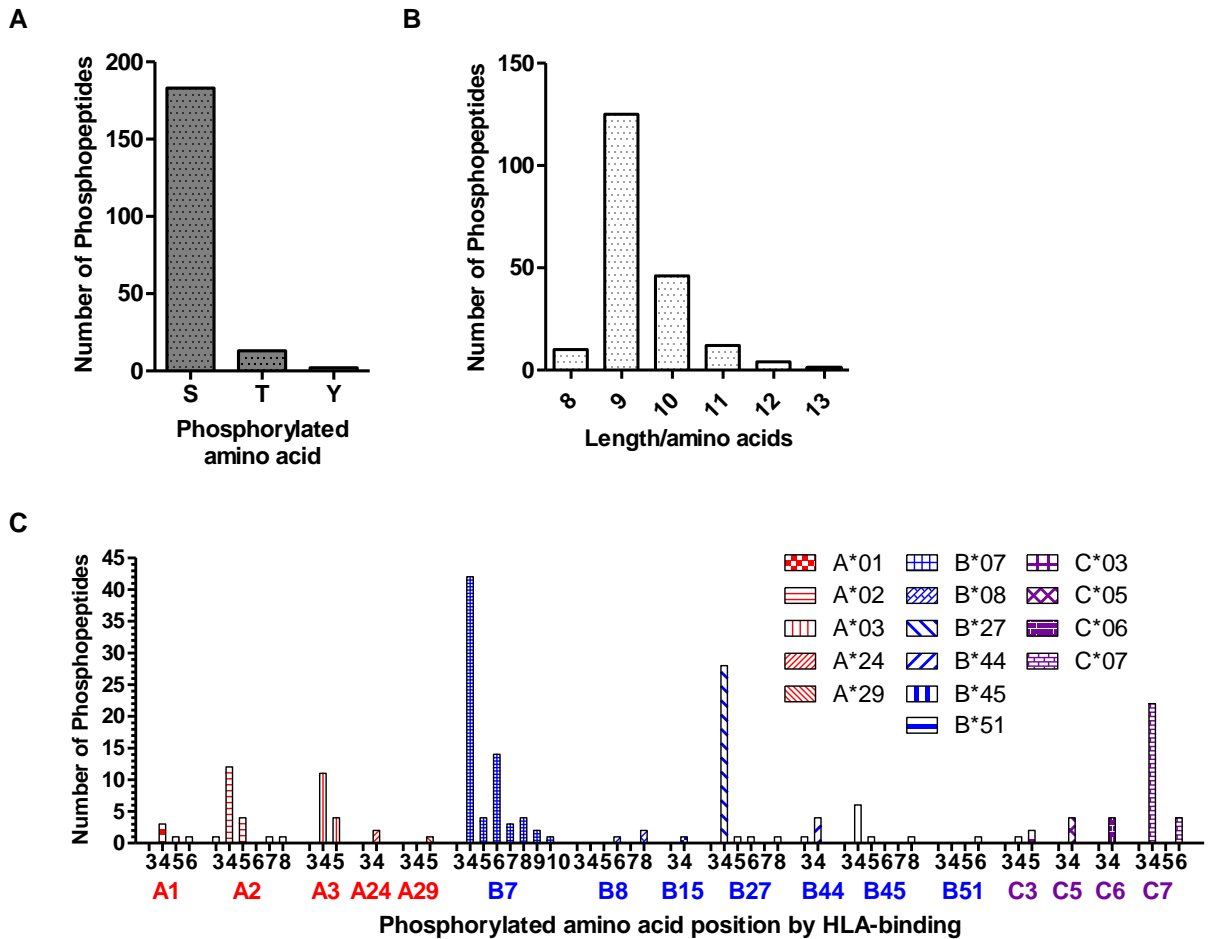

**SUPPLEMENTARY FIGURE S2 | Phosphopeptide characteristics**

- (A) The number of CRC phosphopeptides identified containing phospho-serine (S), phospho-threonine (T) and phospho-tyrosine (Y).
- (B) The lengths of the CRC phosphopeptides identified.
- (C) The position of the phosphorylated amino acid in the phosphopeptides, according to HLA-binding.

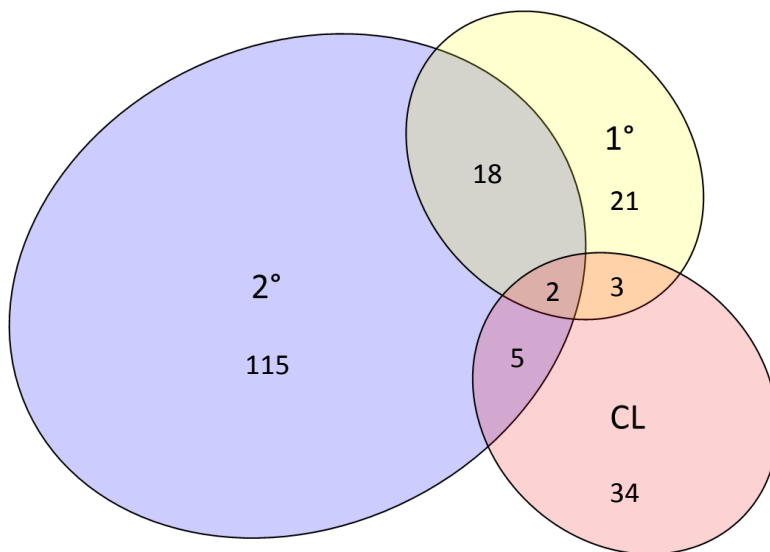

**SUPPLEMENTARY FIGURE S3** | How the phosphopeptides identified are shared between samples

A Euler plot showing the overlap of presentation of phosphopeptides between differing types of CRC samples: - primary CRC – 1°; secondary CRC liver metastases – 2°; and cell lines –CL.

A

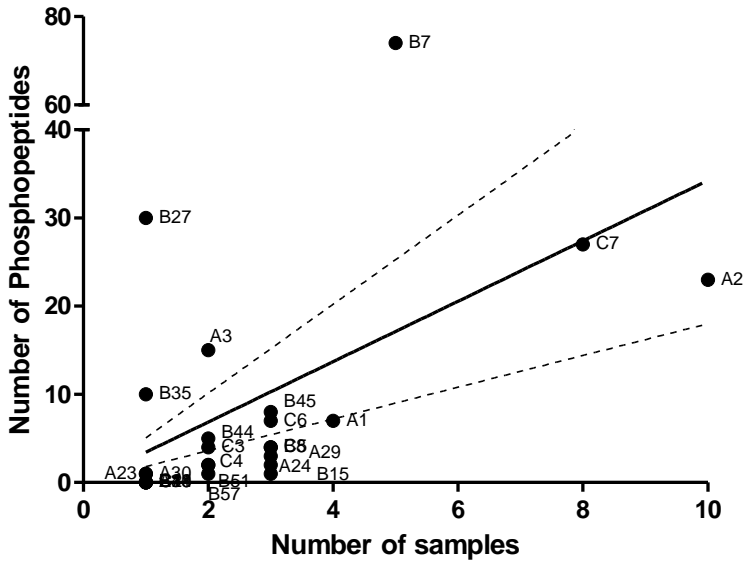

B

| Kinase name     | Consensus sequence | # phosph. sites |
|-----------------|--------------------|-----------------|
| PKACa (PRKACA)  | xxrxRRlSlxxxxxx    | 734             |
| PKCa (PRKCA)    | xxxxRRxSfKrkxxx    | 523             |
| CK2a1 (CSNK2A1) | xxxeedSDdEeeee     | 483             |
| ERK2 (MAPK1)    | xpxpPlSPtppxxx     | 410             |
| CDK1 (CDC2)     | xxxxlpXSPxkkxxx    | 393             |
| SRC             | xxeedvYgxvxxxx     | 385             |
| ERK1            | xpppPlSPtptxxx     | 292             |
| CDK2            | xxxxpxSPgKkxlx     | 201             |
| PDK1 (PDPK1)    | xxgxtTxTFCGTpeY    | 43              |

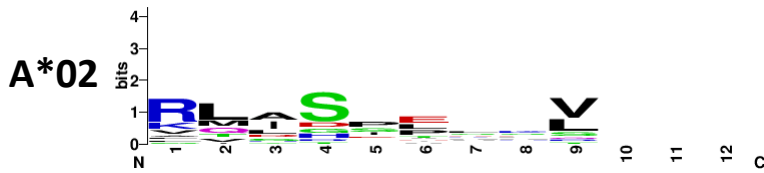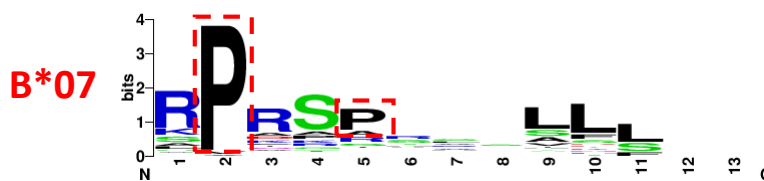

B\*27

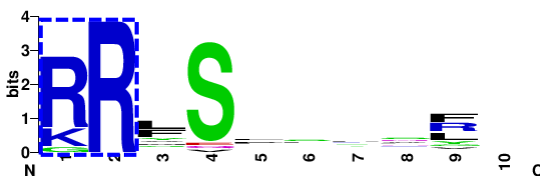

C\*07

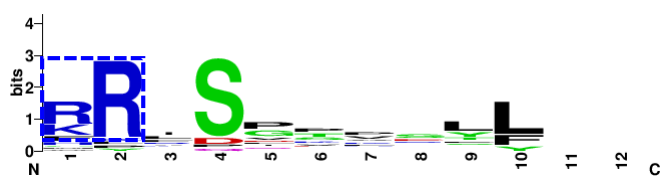

SUPPLEMENTARY FIGURE S4 | Phosphopeptides binding motifs vs. kinase binding motifs

- (A) The number of phosphopeptides identified, plotted against the number of samples of each HLA-type. HLA-B\*07 and HLA-B\*27 are shown to be outliers, with many more phosphopeptides per sample than the general trend.
- (B) Published kinase binding motifs are compared to logoplots of the phosphopeptide sequences identified on CRC, showing key consensus sequences around the phosphoserine are shared for HLA-B\*07 with ERK1 and ERK2; and for HLA-B\*27 and HLA-C\*07 with PKACa and PKCa.



|             | Phospho-peptide | Uniprot # | Source protein | Malignant Samples |                                     |                     |
|-------------|-----------------|-----------|----------------|-------------------|-------------------------------------|---------------------|
|             |                 |           |                | CRC               | Leukemia                            | Melanoma            |
| <b>A*02</b> | RVAsPTSGV       | Q9Y4H2    | IRS2           | colo205, hct116   | CLL1, CLL2, MCL                     | DM331, SLM2, COV413 |
|             | VMIGsPKKV       | Q68CZ2    | TNS3           | sw620             | MCL                                 | DM331, SLM2, COV413 |
|             | VmIGsPKKV       | Q68CZ2    | TNS3           | sw620             | MCL                                 | DM331, SLM2, COV413 |
| <b>B*07</b> | GPRsAsLLSL      | Q9Y4H4    | GPSM3          | CRCLM1            | AML1                                |                     |
|             | RPFsPREAL       | Q86V48    | LUZP1          | CRC1, CRCLM1      | AML1, ALL1, CLL2, CLL4, HCL1, B-LCL |                     |
|             | RPRPVsPSSL      | P57059    | SIK1           | CRC1, CRCLM1      | AML1                                |                     |
|             | RPRsPRQNSI      | Q99700    | ATXN2          | CRCLM1            | AML1, B-LCL                         |                     |
|             | RPVsPFQEL       | unknown   | unknown        | CRC1, CRCLM1      | AML1, ALL1, CLL2, CLL4, HCL1, B-LCL |                     |
|             | TPRsPPLGL       | Q16584    | MAP3K11        | CRC1, CRCLM1      | AML1, CLL2, CLL4, HCL1, B-LCL       |                     |

**SUPPLEMENTARY TABLE S6** | Phosphopeptides shared across different malignancies have been identified in multiple samples

**Key**

- signalling pathway
- phosphopeptide source protein
- result
- key protein

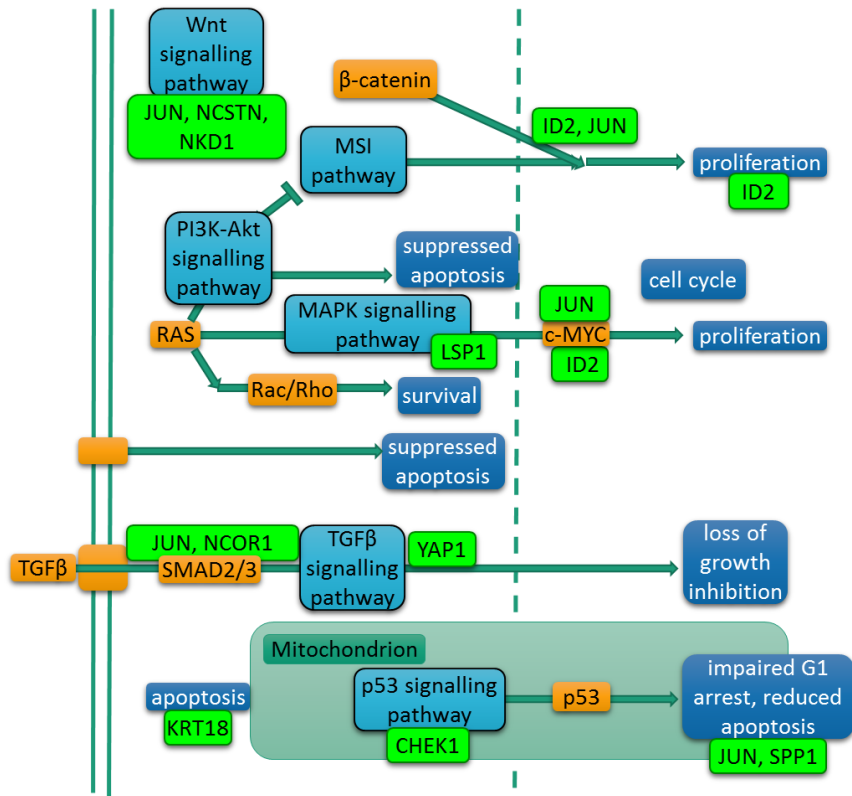

**SUPPLEMENTARY FIGURE S5** | The source proteins of phosphopeptides identified superimposed onto the KEGG CRC signaling pathways

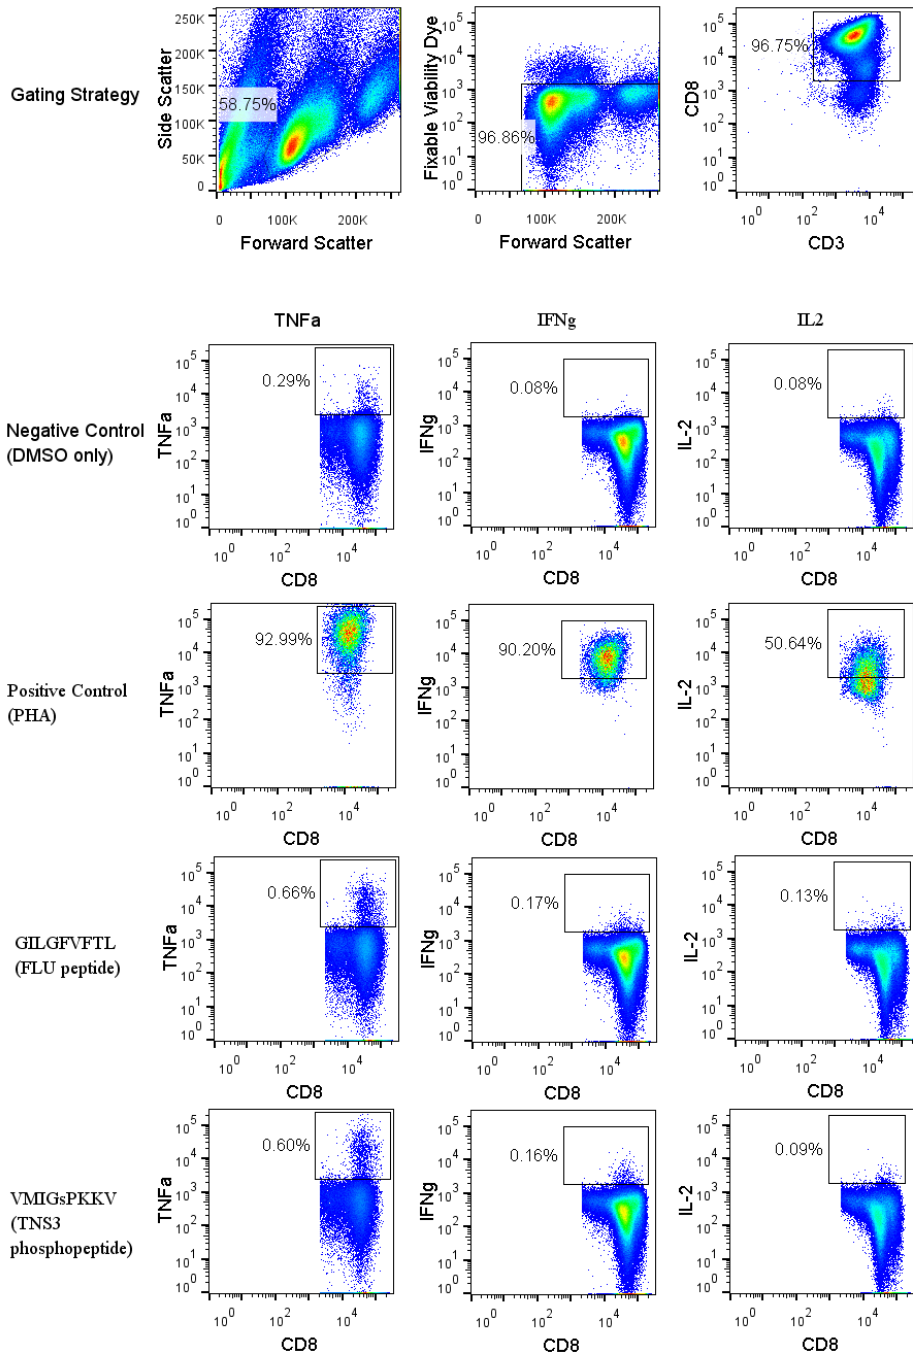

**SUPPLEMENTARY FIGURE S6** | Batch analysis of Intracellular Cytokine Staining (ICS) used to assess TIL targeting of phosphopeptides

**A**

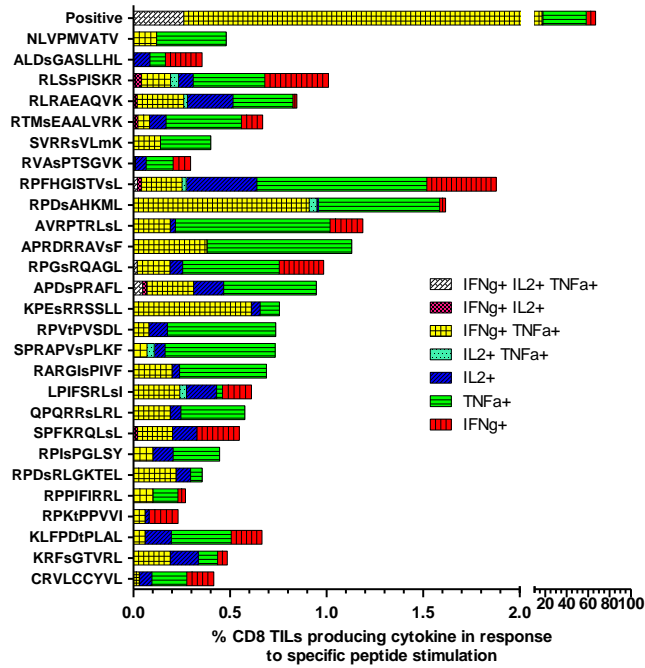

**B**

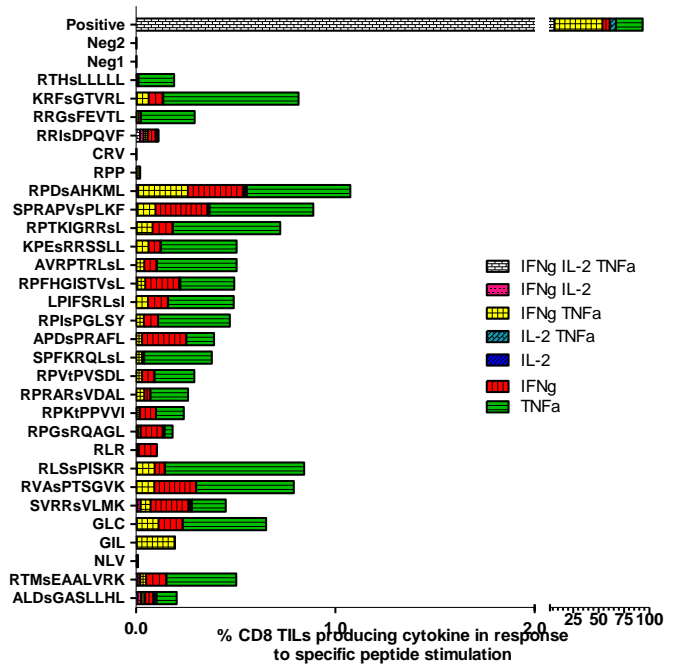

**SUPPLEMENTARY FIGURE S7 |** Raw data for the two different CRCLM1 ICS assay repeats

(A) After one REP cycle of TILs and (B) after a second REP cycle.

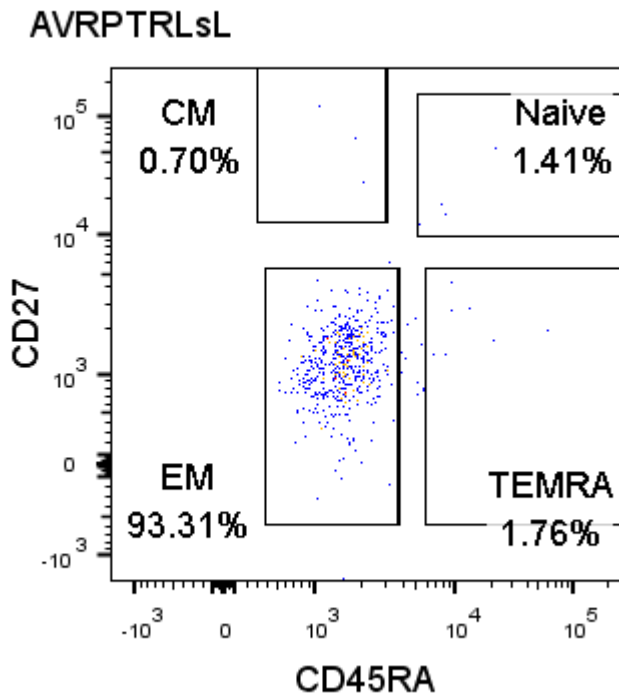

**SUPPLEMENTARY FIGURE S8** | An example of memory phenotype of TIL cultures targeting CRC-associated phosphopeptides

CD45RA and CD27 staining was used to gate central memory (CM), effector memory (EM), naïve and terminal effector memory (TEMRA) phenotypes.



| CRC # | Patient age (at time of sample) | Histology                | Tumour size (mm) | Surgery type               | Tumour Grade | Nodal Status | Metastases | Neo-Adjuvant RT        |
|-------|---------------------------------|--------------------------|------------------|----------------------------|--------------|--------------|------------|------------------------|
| 22    | 68                              | Adenocarcinoma           | 20 x 25 x 10     | Right hemicolectomy        | 1            | 0            | X          | NIL                    |
| 23    | 74                              | Adenocarcinoma           | 40 x 83 x 15     | Right hemicolectomy        | 3            | 0            | x          | NIL                    |
| 25    | 48                              | Mucinous adenocarcinoma  | 65 x 85 x 12     | Subtotal colectomy         | 3            | 0            | x          | NIL                    |
| 26    | 74                              | Adenocarcinoma of rectum | 30 x 20 x 6      | Anastamotic doughnut       | 3            | 0            | x          | 25 Gray in 5 fractions |
| 27    | 66                              | Adenocarcinoma           | 60 x 50          | Left colon distal doughnut | 2            | 0            | x          | NIL                    |

**SUPPLEMENTARY TABLE S7** | Clinical data of CRC patients whose PBMCs were used in the ELISpot assay

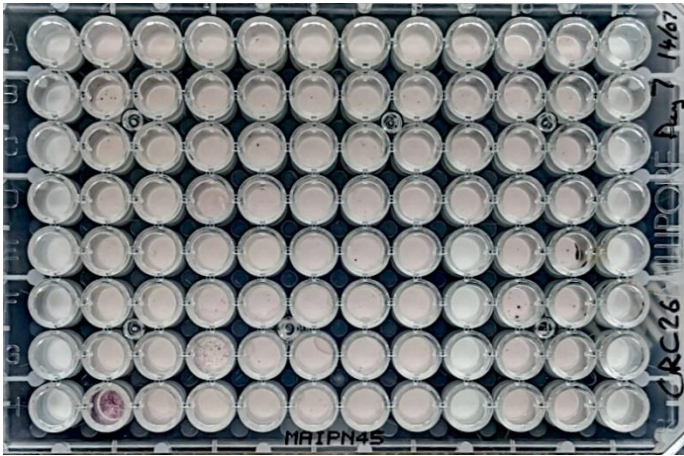

**SUPPLEMENTARY FIGURE S10** | IFN $\gamma$  ELISpot was used to assess *ex vivo* T cell responses to phosphopeptides from healthy donor and CRC patient PBMCs

Blood was collected from healthy donors and CRC patients, the PBMCs extracted and cultured for 6-days in the presence of phosphopeptide. The cells were then transferred to a prepared IFN $\gamma$  ELISpot plate and restimulated with phosphopeptide overnight.



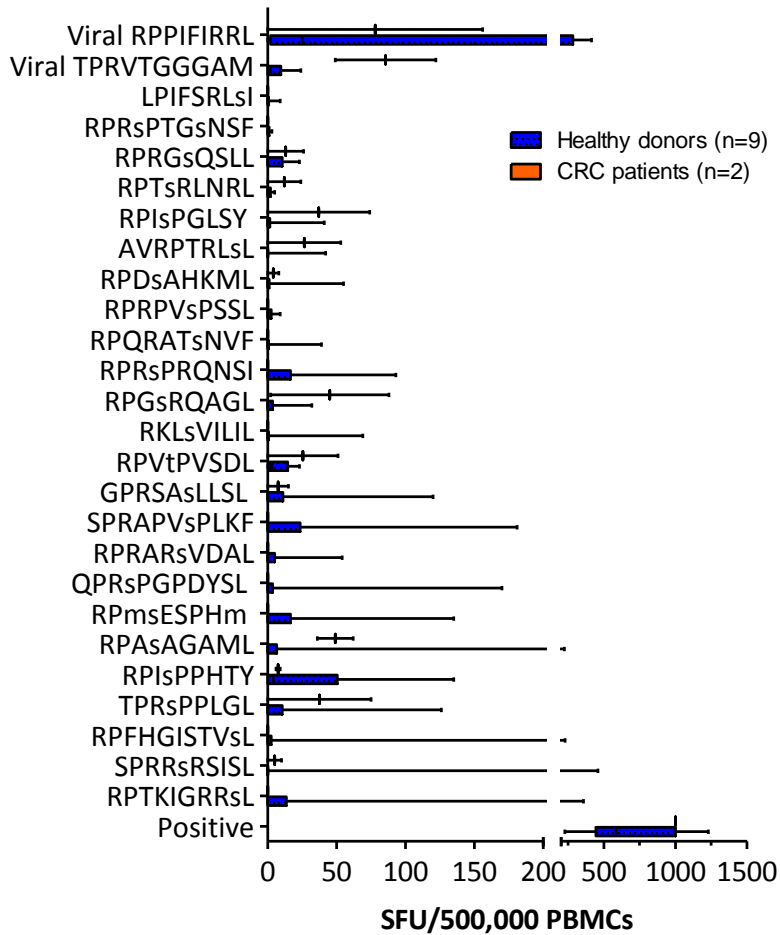

**SUPPLEMENTARY FIGURE S11** | T cells targeting the tumor-associated phosphopeptides are found in a number of patients

Comparison of HD and CRC patient PBMC IFN $\gamma$  production targeting HLA-B\*07-associated phosphopeptides. Too few HLA-B\*07+ patient samples were obtained for meaningful results, as it is a lower frequency allele, yet there were some responses that were higher in patients than healthy donors.

### CRC14 VMI line pre-selection

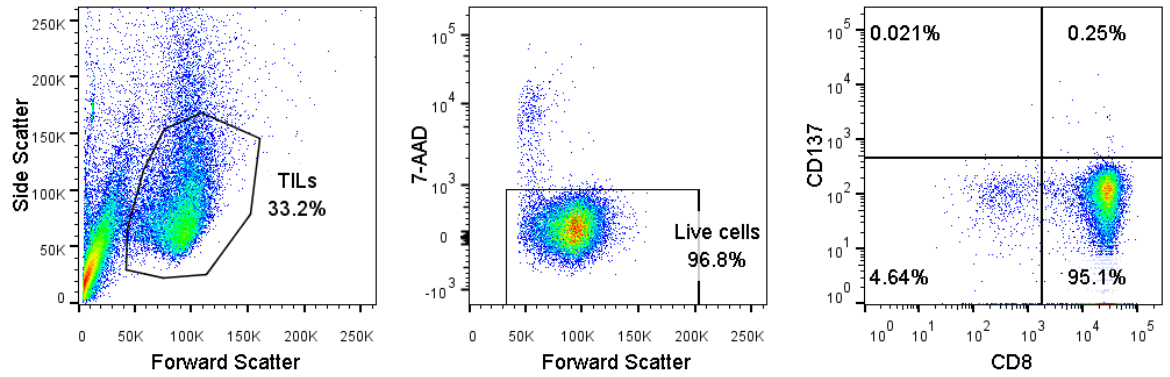

### CRC14 VMI line post CD137 MACS selection

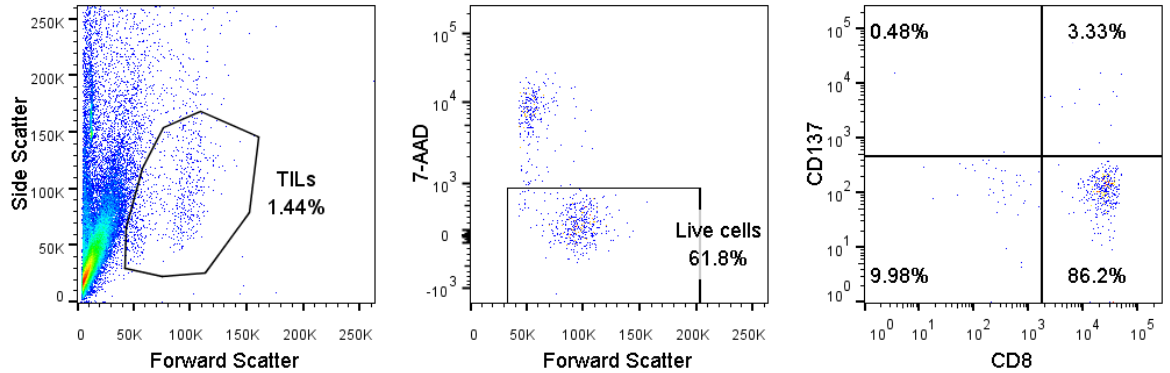

## SUPPLEMENTARY FIGURE S12 | CD137 MACS sorting of CRC14

CD8<sup>+</sup> TILs were plated at 1E6/ml in TIL medium and stimulated with 10 µg/ml of the VMI (TNS3) phosphopeptide. On days 7 and 10 TILs were adjusted to 5E5/ml and half of the medium exchanged. On day 14 phosphopeptide-specific TILs were selected, using CD137 MACS (Miltenyi biotec). Prior to selection, half of the cells were peptide pulsed for 2 hours, washed and added to the other half overnight. These were then rapidly expanded, as described previously.

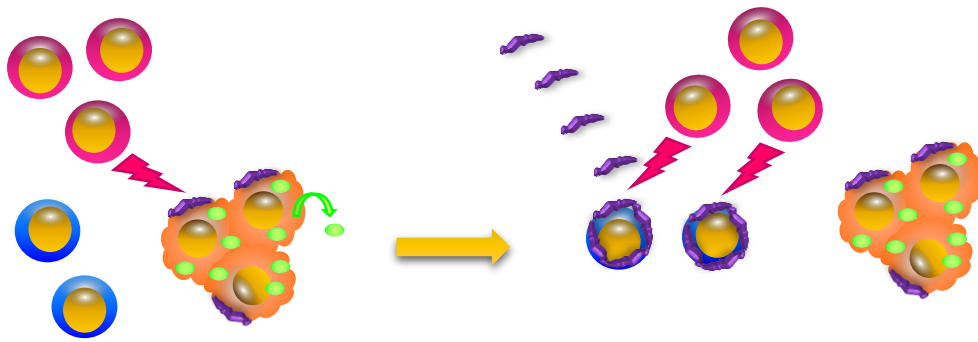

T cells recognise phosphopeptide and kill “hot target” CRC cells, releasing ligand. Autologous B cells (self) are not targeted.

“Cold target” - autologous B cells - pulsed with excess phosphopeptide - act as a decoy and **inhibit** T cell recognition of CRC cells. Ligand is not released.

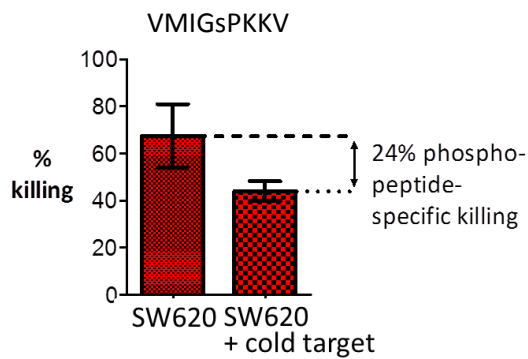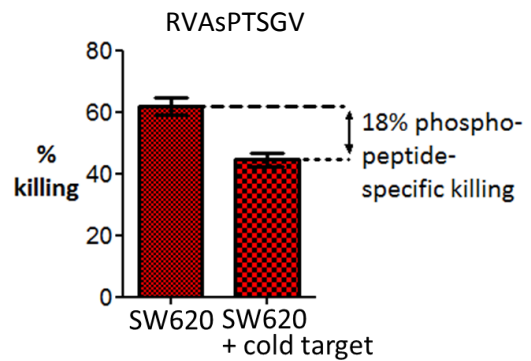

**SUPPLEMENTARY FIGURE S13 | Cold-target inhibition to quantify phosphopeptide-specific killing of CRC cell lines**

Healthy donor PBMCs were used to establish T cell lines targeting two phosphopeptides – VMIGsPKKV and RVAsPTSGV. After selection and rapid expansion, the lines were used in Europium release killing assays to assess killing of Sw620 cells, which natively express those phosphopeptides. Cold-target inhibition was used to quantify the killing that was targeting the phosphopeptides, as depicted.

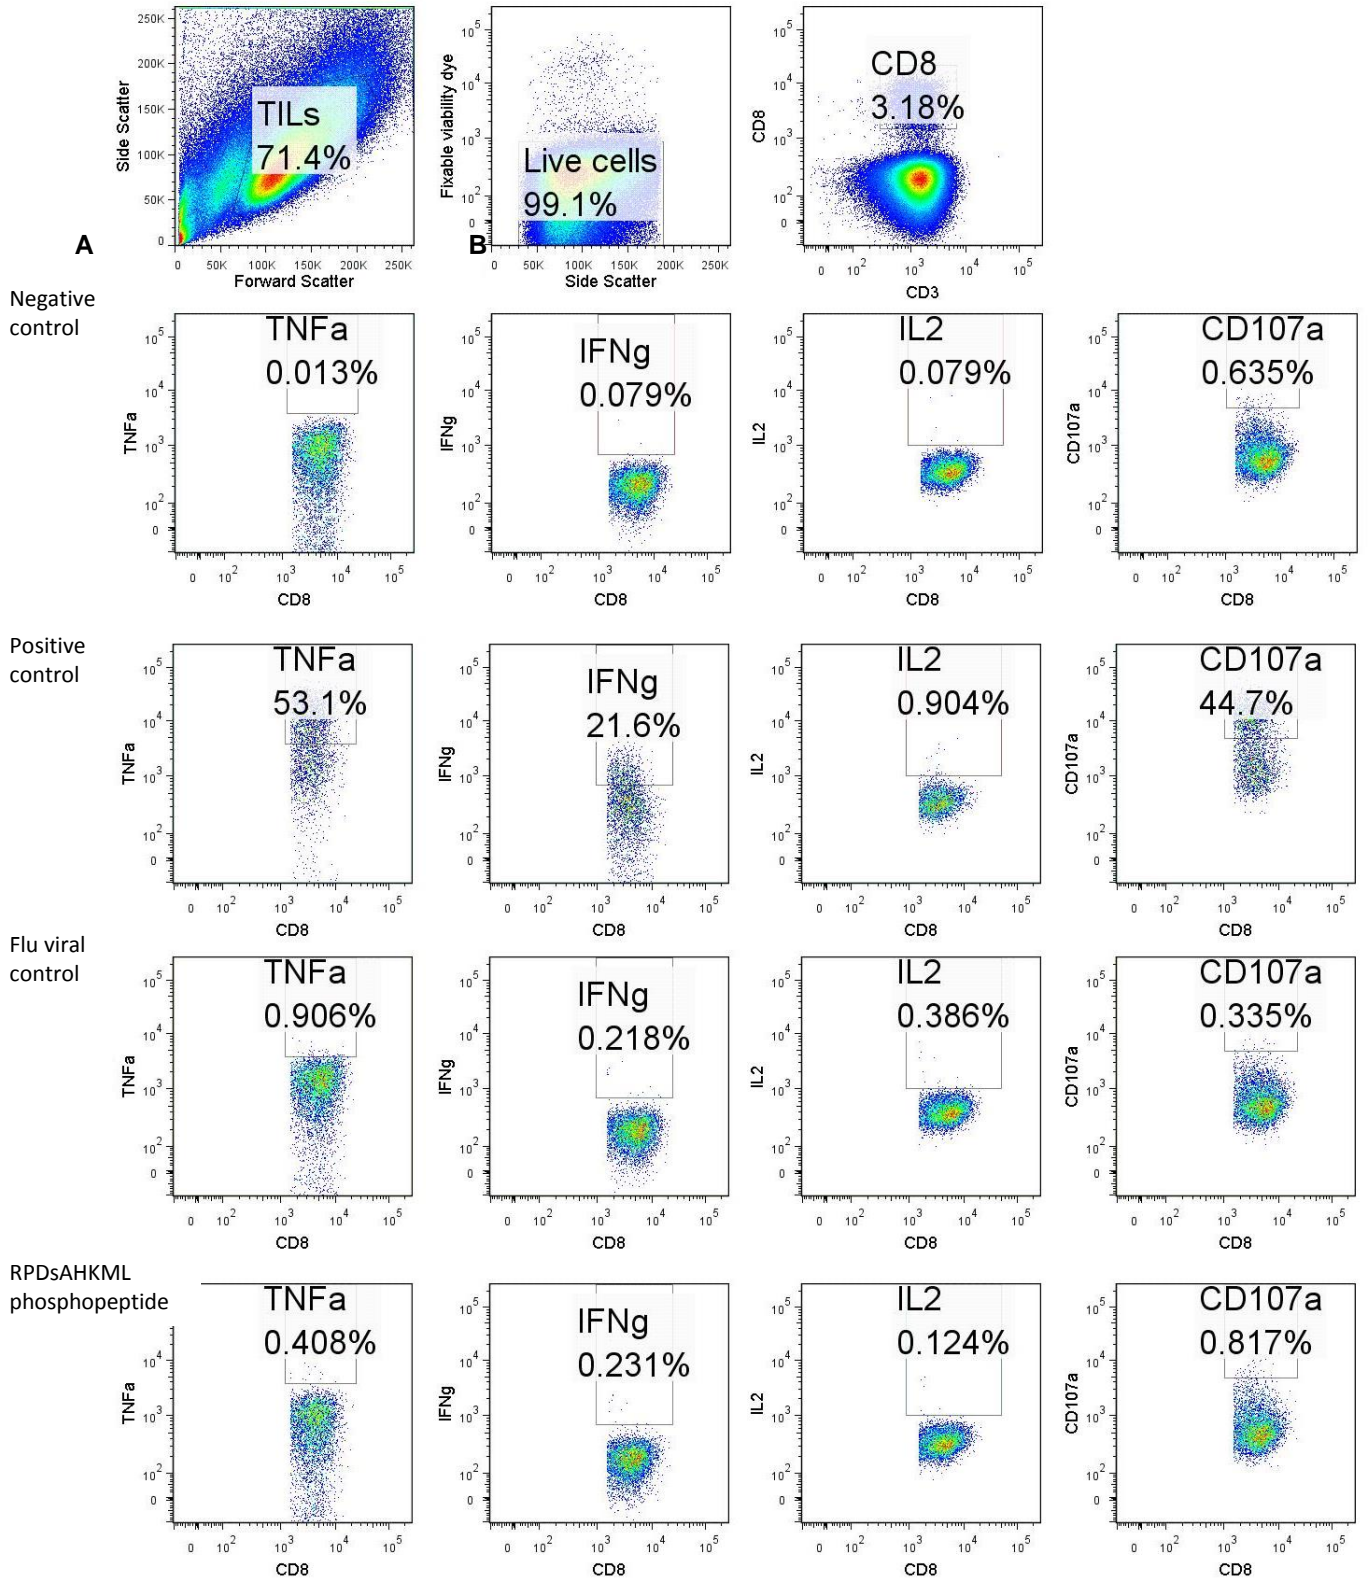

**SUPPLEMENTARY FIGURE S14** | Degranulation marker CD107a is upregulated in response to phosphopeptide RPDsAHKML in young CRCLM1 TILs, but not bystander T cells targeting a peptide from influenza.
